# Supplementary material for: Epidemiology of heart failure in Germany: a retrospective database study
Source: Springer Nature journal article supplement (doi:10.1007/s00392-017-1137-7), 2017-07-26
Supplement: MOESM1 [file 13330268]

## **Electronic supplementary material**

### **Epidemiology of heart failure in Germany: a retrospective database study**

#### *Clinical Research in Cardiology*

**Stefan Störk • Renate Handrock • Josephine Jacob • Jochen Walker • Frederico Calado • Raquel Lahoz  
Stephan Hupfer • Sven Klebs**

**Corresponding author:**

Professor Stefan Störk

Comprehensive Heart Failure Centre Würzburg and Department of Internal Medicine I, University and  
University Hospital Würzburg, Würzburg, Germany

e-mail address: [Stoerk\\_S@ukw.de](mailto:Stoerk_S@ukw.de)

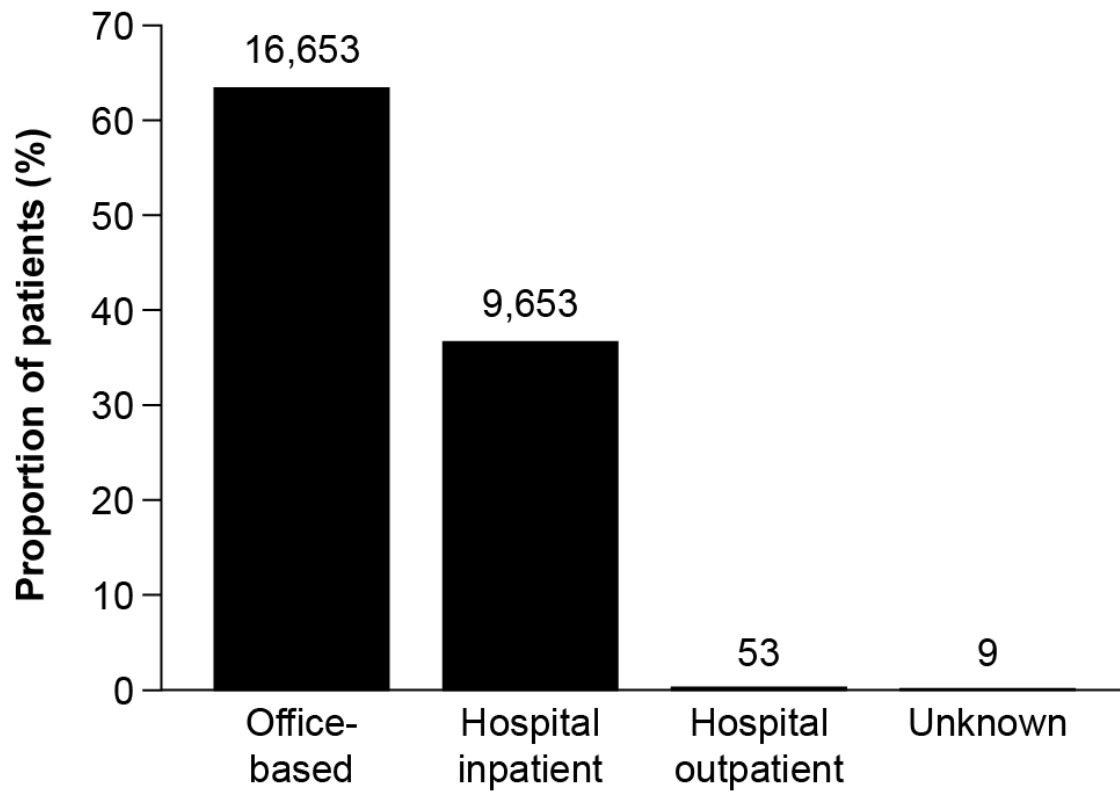

**Supplemental Fig. 1** The setting in which patients were newly diagnosed with heart failure

The numbers of patients diagnosed in each setting are shown

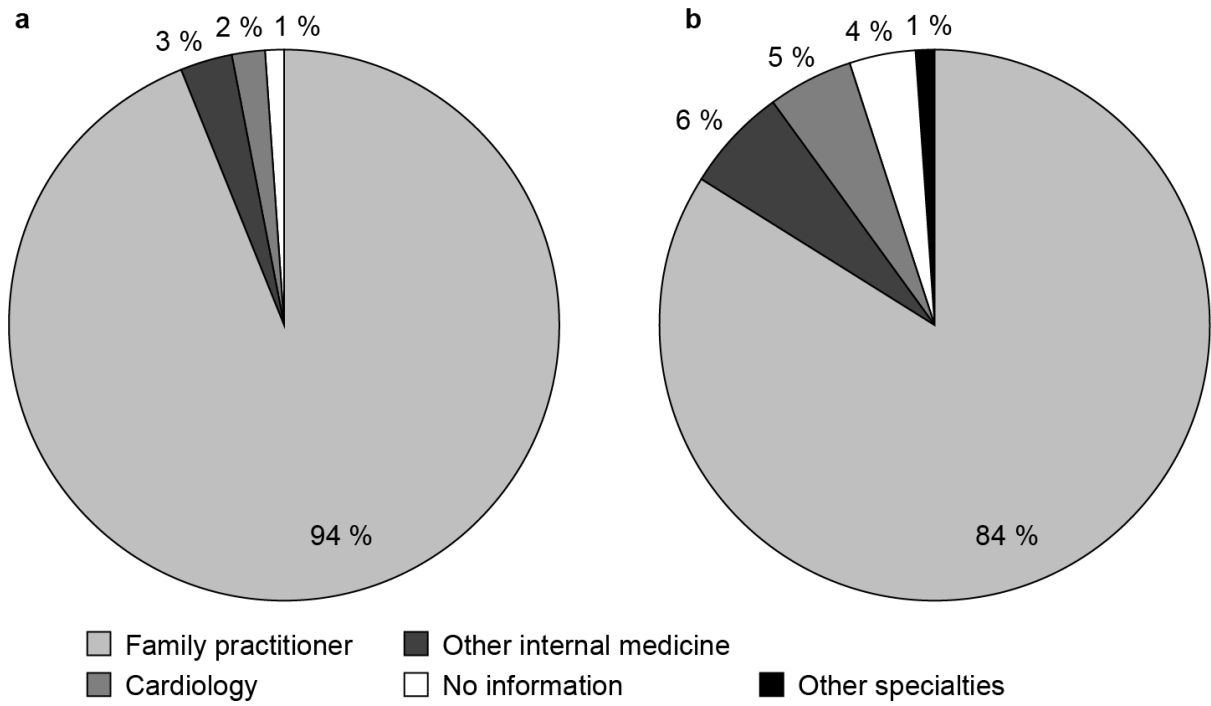

**Supplemental Fig. 2** Professional background of physicians providing patients with **a** initial prescriptions and **b** follow-up prescriptions for pharmacotherapy for heart failure
